# Supplementary material
Source: PubMed Central journal article supplement (PMC9851990)
Supplement: NIHMS1838599-supplement-Supplemental_Publication_Material.pdf [file NIHMS1838599-supplement-Supplemental_Publication_Material.pdf]

## SUPPLEMENTAL MATERIAL

### **Clinician and Algorithmic Application of the 2019 and 2022 SCAI Shock Stages in the Critical Care Cardiology Trials Network Registry**

Siddharth M. Patel, MD<sup>a\*</sup>; David D. Berg, MD, MPH<sup>a\*</sup>; Erin A. Bohula, MD, DPhil<sup>a</sup>; Vivian M. Baird-Zars, MPH<sup>a</sup>; Christopher F. Barnett, MD, MPH<sup>b</sup>; Gregory W. Barsness MD;<sup>c</sup> Sunit-Preet Chaudhry, MD<sup>d</sup>; Lori B. Daniels, MD, MAS<sup>e</sup>; Sean van Diepen, MD, MSc<sup>f</sup>; Shahab Ghafghazi, MD<sup>g</sup>; Michael J. Goldfarb, MD<sup>h</sup>; Jacob C. Jentzer, MD<sup>c</sup>; Jason N. Katz, MD, MHS<sup>i</sup>; Benjamin B. Kenigsberg, MD<sup>j</sup>; Patrick R. Lawler, MD, MPH<sup>k</sup>; P. Elliot Miller, MD, MHS<sup>l</sup>; Alexander I. Papolos, MD<sup>j</sup>; Jeong-Gun Park, PhD<sup>a</sup>; Brian J. Potter, MDCM, SM<sup>m</sup>; Rajnish Prasad, MD<sup>n</sup>; N. Sarma V. Singam, MD<sup>c</sup>; Shashank S. Sinha, MD, MSc<sup>o</sup>; Michael A. Solomon, MD, MBA<sup>p</sup>; Jeffrey J. Teuteberg, MD<sup>q</sup>; David A. Morrow, MD, MPH<sup>a</sup> on behalf of the CCCTN Investigators<sup>†</sup>

\*Co-authors contributed equally

#### **Affiliations:**

<sup>†</sup>Listed in the supplement

<sup>a</sup> Levine Cardiac Intensive Care Unit, TIMI Study Group, Cardiovascular Division, Department of Medicine, Brigham and Women's Hospital, Harvard Medical School, Boston, Massachusetts, USA.

<sup>b</sup> Division of Cardiology, Department of Medicine, University of California San Francisco, San Francisco, California, USA.

<sup>c</sup> Department of Cardiovascular Medicine, Mayo Clinic, Rochester, Minnesota, USA.

<sup>d</sup> Department of Medicine, St Vincent Heart Center, Indianapolis, Indiana, USA.

<sup>e</sup> Division of Cardiovascular Medicine, Department of Medicine, University of California San Diego, La Jolla, California, USA.

<sup>f</sup> Department of Critical Care Medicine and Division of Cardiology, Department of Medicine, University of Alberta, Edmonton, Alberta, Canada.

<sup>g</sup> Cardiovascular Medicine, University of Louisville, Louisville, Kentucky, USA

<sup>h</sup> Division of Cardiology, McGill University, Montreal, Canada.

<sup>i</sup> Division of Cardiology, Department of Medicine, Duke University, Durham, North Carolina, USA.

<sup>j</sup> Departments of Cardiology and Critical Care, MedStar Washington Hospital Center, Washington, DC, USA.

<sup>k</sup> Peter Munk Cardiac Centre at Toronto General Hospital, Division of Cardiology and Interdepartmental Division of Critical Care Medicine, University of Toronto, Toronto, Ontario, Canada

<sup>l</sup> Section of Cardiovascular Medicine, Department of Internal Medicine, Yale University School of Medicine, New Haven, Connecticut, USA.

<sup>m</sup> Centre Hospitalier de l'Université de Montréal (CHUM) Research Center and Cardiovascular Center, Montreal, QC, Canada.

<sup>n</sup> Wellstar Health System, Marietta, Georgia, USA.

<sup>o</sup> Inova Heart and Vascular Institute, Inova Fairfax Medical Center, Falls Church, Virginia, USA.

<sup>p</sup> Critical Care Medicine Department, National Institutes of Health Clinical Center and Cardiovascular Branch, National Heart, Lung, and Blood Institute of the National Institutes of Health, Bethesda, Maryland, USA.

<sup>q</sup> Division of Cardiovascular Medicine, Department of Medicine, Stanford University, Stanford, California, USA.

## TABLE OF CONTENTS

|                                                 |           |
|-------------------------------------------------|-----------|
| <b>CCCTN Leadership and Investigators .....</b> | <b>3</b>  |
| <b>Supplemental Methods .....</b>               | <b>5</b>  |
| <b>Supplemental Table 1 .....</b>               | <b>6</b>  |
| <b>Supplemental Table 2 .....</b>               | <b>7</b>  |
| <b>Supplemental Table 3 .....</b>               | <b>8</b>  |
| <b>Supplemental Table 4 .....</b>               | <b>9</b>  |
| <b>Supplemental Table 5 .....</b>               | <b>10</b> |
| <b>Supplemental Table 6 .....</b>               | <b>11</b> |
| <b>Supplemental Table 7 .....</b>               | <b>12</b> |
| <b>Supplemental Figure 1 .....</b>              | <b>13</b> |
| <b>Supplemental Figure 2 .....</b>              | <b>14</b> |
| <b>Supplemental Figure 3 .....</b>              | <b>15</b> |
| <b>Supplemental Figure 4 .....</b>              | <b>16</b> |
| <b>Supplemental Figure 5 .....</b>              | <b>17</b> |
| <b>Supplemental Figure 6 .....</b>              | <b>18</b> |
| <b>Supplemental Figure 7 .....</b>              | <b>19</b> |

## **CCCTN LEADERSHIP AND INVESTIGATORS**

### **EXECUTIVE COMMITTEE**

David A. Morrow, MD MPH, Jason N. Katz, MD MHS, Sean van Diepen, MD MSc.

### **STEERING COMMITTEE**

Carlos L. Alviar, MD, Christopher F. Barnett, MD, Sunit-Preet Chaudhry, MD, Lori B. Daniels, MD, Michael C. Kontos, MD, Shashank S. Sinha, MD

### **CCCTN DATA COORDINATING CENTER (TIMI STUDY GROUP)**

Marc S. Sabatine, MD MPH (TIMI Study Group Chairman), David A. Morrow, MD MPH (TIMI Principal Investigator), Erin A Bohula, MD DPhil (Co-Investigator), David D. Berg, MD (Co-Investigator), Vivian Baird-Zars, MPH (Project Manager/Data Manager), Sabina A. Murphy, MPH (Director of Statistics), Cardiovascular Division, Department of Medicine, Brigham and Women's Hospital, Boston, MA.

### **COLLABORATING CENTERS**

**Brigham and Women's Hospital**, Boston, MA: E Bohula (PI), D Morrow (Co-Investigator), K Butler (Research Coordinator).

**Cleveland Clinic Foundation**, Cleveland, OH: V Menon (PI), P Cremer (Investigator), O Abou Hassan, D. Hughes, R. Reyaldeen (Sub-Is), K Rutkowski (Nurse Coordinator).

**Cooper University Hospital**, Camden, NJ: S Hollenberg (PI), A Bakhshi, E Caruso, J Cruz, D Ricketti, J Weinstock (Sub-Is).

**Duke University**, Durham, NC: C Granger (PI), K Newby (Co-PI), K Brown, A Carnicelli, E Echols, R Harrison, J Katz, R Keane, D Loriaux (Sub-Is).

**INOVA Fairfax Hospital / INOVA Heart and Vascular Institute**, Falls Church, VA: S Sinha (PI), L Genovese (Sub-I), A Dewanjee, A Raja (Research Coordinators).

**Jewish General Hospital / McGill**, Montreal, Quebec, Canada: M Goldfarb (PI), C Robert (Study Coordinator).

**Johns Hopkins Hospital**, Baltimore, MD: S Zakaria (PI), T Metkus (Past PI), S Schulman (Co-I).

**Lehigh Valley Health Network**, Allentown, PA: J Burke (PI), T Maitz, L Racharla, S Vadhar (Sub-Is), K Cornell (Research Coordinator).

**Mayo Clinic**, Rochester, MN: G Barsness (PI), J Gladden, J Jentzer, N Singam (Sub-Is).

**MedStar Washington Hospital Center**, Washington, DC: A Papolos (PI), A Brown, L Carter, B Kenigsberg, K Miltner (Sub-Is).

**National Institutes of Health**, Bethesda, MD: M Solomon (PI), N Rassekh, K Thompson (Sub-Is).

**New York University Langone Health**, New York, NY: N Keller (PI), C Alviar (Co-Investigator), D Petit Del, K Selig (Research Coordinators).

**Northwell Health, Lenox Hill**, New York, NY: R Roswell (PI), R Bar-Cohen (Sub-I), K Coleman (Research Coordinator).

**Northwell Health, North Shore**, New York, NY: E Grayver (PI), M Pierce (Co-PI), G Robinson (Sub-I), K Coleman (Research Coordinator).

**Rush University Medical Center**, Chicago, IL: J Snell (PI) N Jahan, S Majid (Research Coordinators).

**Stanford Hospital & Clinics**, Stanford, CA: J Teuteberg (PI), D Gerber (Co-PI), P Sanchez (Sub-I).

**St. Vincent Indianapolis/St. Vincent Heart Center of Indiana**, Indianapolis, IN: SP Chaudhry (PI), A Patel (Sub-I), B Wendling (Research Coordinator).

**Toronto General Hospital, University of Toronto**, Toronto, ON Canada: P Lawler (PI), M Mahanta (Research Coordinator).

**University of Alberta**, Edmonton, Alberta, Canada: S van Diepen (PI), W Tymchak (Co-PI), N Hogg (Research Coordinator).

**University of Florida**, Gainesville, FL: E Keeley (PI), G Bhattal, D Leach (Sub-Is), S Long, J Bostick, A Osman (Research Coordinators).

**University of California San Diego**, La Jolla, CA: L Daniels (PI), N Phreaner (Sub-I), M Correa, E Kormuskins, A Mody, A Rehman, R Sedighi, D Smith, A Toomu, S Toomu, I Tran (Research Coordinators).

**University of Louisville**, Louisville, KY: S. Ghafghazi (PI), P Katrapati, K Kassem, S Zhang (Research fellows), S Vincent (Study Nurse).

**University of North Carolina**, Chapel Hill, NC: J Katz (Past PI), C Dangerfield, R Orgel (Sub-Is), Z Ozen, E Prosser (Investigators), T Wade (Research Coordinator).

**University of Utah Health**, Salt Lake City, UT: K Shah (PI), J Almajed, J Fang, T Hanff (Sub-Is), J Hong (Research Coordinator).

**Vancouver General Hospital**, Vancouver, British Columbia, Canada: C Fordyce (PI), G Wong (Co-PI), J Chow, A Noronha (Research Coordinators).

**Virginia Commonwealth University**, Richmond, VA: M Kontos (PI), S Dow, C Vo (Sub-Is), D Spillman (Research Coordinator).

**Yale University**, New Haven, CT: E Miller (PI), K Love, M Phommalin, A Thomas (Sub-Is).

## **Supplemental Methods**

The vasoactive-inotropic score (VIS) is calculated using vasoactive drug doses as follows:

$$\text{VIS} = \text{dobutamine} + \text{dopamine} + 10 \cdot \text{phenylephrine} + 10 \cdot \text{milrinone} + 100 \cdot \text{epinephrine} + 100 \cdot \text{norepinephrine} + 10,000 \cdot \text{vasopressin}$$

Doses for all agents are in  $\mu\text{g}/\text{kg}/\text{min}$  with the exception of vasopressin which is in  $\text{units}/\text{kg}/\text{min}$ .

**Supplemental Table 1: CCCTN Adaptation of the 2019 SCAI Cardiogenic Shock Staging Criteria**

| SCAI Stage                           | Original SCAI Criteria (2019) <sup>1</sup>                                                                                                                                                                                          | Original CCCTN Algorithm (2019 SCAI Adaptation) <sup>2</sup>                                                                                                                                                                                             |
|--------------------------------------|-------------------------------------------------------------------------------------------------------------------------------------------------------------------------------------------------------------------------------------|----------------------------------------------------------------------------------------------------------------------------------------------------------------------------------------------------------------------------------------------------------|
| <b>C</b><br><b>(“classic”)</b>       | <ul style="list-style-type: none"> <li>Hypoperfusion requiring intervention beyond volume resuscitation</li> <li>Typically have relative hypotension</li> </ul>                                                                     | <ul style="list-style-type: none"> <li>Site-reported CS <b>AND</b></li> <li>Baseline eGFR &lt;45 or AST/ALT &gt; 150 or worst lactate ≥2 <b>AND</b></li> <li>Use of vasoactive agents or MCS</li> </ul>                                                  |
| <b>D</b><br><b>(“deteriorating”)</b> | <ul style="list-style-type: none"> <li>Similar to stage C but getting worse</li> <li>Failure to respond to initial interventions – requiring multiple pressors or addition of MCS to maintain perfusion</li> </ul>                  | <ul style="list-style-type: none"> <li>Site-reported CS and lab criteria of stage C above <b>AND</b></li> <li>Use of multiple vasoactive agents or escalation to MCS &gt;24h from admission (new or &gt;1 device) OR</li> <li>Lactate ↑ ≥ 50%</li> </ul> |
| <b>E</b><br><b>(“extremis”)</b>      | <ul style="list-style-type: none"> <li>CA with ongoing CPR or ECMO or hypotension despite maximal support</li> <li>Being supported by multiple interventions</li> <li>“Trying to die”: lactate ≥ 5, may include pH ≤ 7.2</li> </ul> | <ul style="list-style-type: none"> <li>Site-reported CS <b>AND</b></li> <li>Worst lactate ≥5 or pH ≤ 7.2</li> </ul>                                                                                                                                      |

CA = cardiac arrest; CCCTN = Critical Care Cardiology Trials Network; CPR = cardiopulmonary resuscitation; ECMO = extracorporeal membrane oxygenation; CS = cardiogenic shock; eGFR = estimated glomerular filtration rate; MCS = mechanical circulatory support; SCAI = Society of Cardiovascular Angiography and Interventions.

**Supplemental Table 2:** Reclassification of Algorithm-based 2019 SCAI Stage by Clinician-assigned 2019 SCAI stage

| <b>In-Hospital Death?</b> | <b>Clinician Assignment (2019 SCAI)<br/>vs.<br/>Original CCCTN Algorithm (2019 SCAI)</b> | <b>% Reclassification (n/N)</b> |
|---------------------------|------------------------------------------------------------------------------------------|---------------------------------|
| <b>Yes<br/>(N=472)</b>    | <b>Agreement</b>                                                                         | <b>40.3% (190/472)</b>          |
|                           | <b>Correctly Up-classified</b>                                                           | <b>7.0% (33/472)</b>            |
|                           | <b>Incorrectly Down-classified</b>                                                       | <b>52.8% (249/472)</b>          |
| <b>No<br/>(N=868)</b>     | <b>Agreement</b>                                                                         | <b>39.6% (344/868)</b>          |
|                           | <b>Correctly Down-classified</b>                                                         | <b>56.7% (493/868)</b>          |
|                           | <b>Incorrectly Up-classified</b>                                                         | <b>3.6% (31/868)</b>            |

CCCTN = Critical Care Cardiology Trials Network; SCAI = Society of Cardiovascular Angiography and Interventions.

**Supplemental Table 3: Patient Characteristics by Algorithm-based and Clinician-assigned 2019 SCAI Stage**

|                               | SCAI Stage C                      |                              | SCAI Stage D                      |                              | SCAI Stage E                      |                              |
|-------------------------------|-----------------------------------|------------------------------|-----------------------------------|------------------------------|-----------------------------------|------------------------------|
|                               | CCCTN 2019 SCAI Algorithm (N=280) | Clinician Assessment (N=778) | CCCTN 2019 SCAI Algorithm (N=535) | Clinician Assessment (N=433) | CCCTN 2019 SCAI Algorithm (N=525) | Clinician Assessment (N=129) |
| <b>Demographics</b>           |                                   |                              |                                   |                              |                                   |                              |
| Age, years                    | 67 (56-76)                        | 65 (55-74)                   | 64 (55-72)                        | 66 (57-74)                   | 67 (58-75)                        | 67 (60-75)                   |
| Female                        | 90 (32.1)                         | 253 (32.5)                   | 174 (32.5)                        | 148 (34.2)                   | 187 (35.6)                        | 50 (38.8)                    |
| White                         | 167 (65.2)                        | 444 (64.0)                   | 319 (68.5)                        | 276 (74.4)                   | 302 (66.1)                        | 68 (59.6)                    |
| BMI, kg/m <sup>2</sup>        | 27.9 (23.8-31.8)                  | 27.1 (23.7-31.7)             | 27.6 (23.8-32.0)                  | 27.6 (23.7-32.4)             | 26.8 (23.6-32.0)                  | 27.9 (24.7-32.1)             |
| <b>Comorbidities</b>          |                                   |                              |                                   |                              |                                   |                              |
| Hypertension                  | 176 (62.9)                        | 475 (61.1)                   | 321 (60.0)                        | 258 (59.6)                   | 313 (59.6)                        | 77 (59.7)                    |
| Diabetes mellitus             | 116 (41.4)                        | 300 (38.6)                   | 206 (38.5)                        | 160 (37.0)                   | 194 (37.0)                        | 56 (43.4)                    |
| Current smoker                | 48 (17.2)                         | 128 (16.5)                   | 71 (13.3)                         | 67 (15.5)                    | 99 (18.9)                         | 23 (17.8)                    |
| Chronic kidney disease        | 88 (31.4)                         | 228 (29.3)                   | 157 (29.3)                        | 108 (24.9)                   | 121 (23.0)                        | 30 (23.3)                    |
| Dialysis dependent            | 8 (9.1)                           | 29 (12.7)                    | 21 (13.4)                         | 21 (19.4)                    | 29 (24.0)                         | 8 (26.7)                     |
| Coronary artery disease       | 108 (38.6)                        | 284 (36.5)                   | 199 (37.2)                        | 155 (35.8)                   | 172 (32.8)                        | 40 (31.0)                    |
| Cerebrovascular disease       | 21 (7.5)                          | 69 (8.9)                     | 42 (7.9)                          | 28 (6.5)                     | 43 (8.2)                          | 9 (7.0)                      |
| Peripheral artery disease     | 21 (7.5)                          | 73 (9.4)                     | 50 (9.3)                          | 41 (9.5)                     | 54 (10.3)                         | 11 (8.5)                     |
| Prior heart failure           | 163 (58.2)                        | 436 (56.0)                   | 325 (60.7)                        | 227 (52.4)                   | 217 (41.3)                        | 42 (32.6)                    |
| Severe valvular disease       | 56 (20.0)                         | 129 (16.6)                   | 100 (18.7)                        | 71 (16.4)                    | 60 (11.4)                         | 16 (12.4)                    |
| Pulmonary hypertension        | 31 (11.1)                         | 69 (8.9)                     | 51 (9.5)                          | 38 (8.8)                     | 34 (6.5)                          | 9 (7.0)                      |
| Significant pulmonary disease | 43 (15.4)                         | 99 (12.7)                    | 59 (11.0)                         | 57 (13.2)                    | 74 (14.1)                         | 20 (15.5)                    |
| Significant liver disease     | 9 (3.2)                           | 20 (2.6)                     | 15 (2.8)                          | 6 (1.4)                      | 4 (0.8)                           | 2 (1.6)                      |

All values represent n (%) for categorical measures and median (25-75<sup>th</sup> percentile) for continuous measures. BMI = body mass index; CCCTN = Critical Care Cardiology Trials Network; SCAI = Society of Cardiovascular Angiography and Interventions.



**Supplemental Table 4:** Illness Severity, Resource Utilization and Shock Management for Algorithm-Based vs. Clinician Assigned 2019 SCAI Stage

|                                  | SCAI Stage C                      |                              | SCAI Stage D                      |                              | SCAI Stage E                      |                              |
|----------------------------------|-----------------------------------|------------------------------|-----------------------------------|------------------------------|-----------------------------------|------------------------------|
|                                  | CCCTN 2019 SCAI Algorithm (N=280) | Clinician Assessment (N=778) | CCCTN 2019 SCAI Algorithm (N=535) | Clinician Assessment (N=433) | CCCTN 2019 SCAI Algorithm (N=525) | Clinician Assessment (N=129) |
| <b>Illness Severity</b>          |                                   |                              |                                   |                              |                                   |                              |
| Total Day 1 SOFA Score           | 6.0 (5.0-8.5)                     | 7.0 (5.0-9.0)                | 7.0 (5.0-10.0)                    | 9.0 (6.0-12.0)               | 10.0 (7.0-12.0)                   | 11.0 (9.0-13.0)              |
| IABP SHOCK-II Score              | 2.0 (1.0-3.0)                     | 2.0 (1.0-3.0)                | 1.0 (1.0-2.0)                     | 2.0 (1.0-3.0)                | 3.0 (2.0-4.0)                     | 3.0 (2.0-4.0)                |
| Preceding cardiac arrest         | 40 (14.3)                         | 169 (21.7)                   | 94 (17.6)                         | 128 (29.6)                   | 241 (45.9)                        | 78 (60.5)                    |
| <b>ICU Resource Utilization</b>  |                                   |                              |                                   |                              |                                   |                              |
| Mechanical ventilation           | 72 (25.7)                         | 330 (42.4)                   | 282 (52.7)                        | 297 (68.6)                   | 391 (74.5)                        | 118 (91.5)                   |
| Renal replacement therapy        | 12 (4.3)                          | 89 (11.4)                    | 93 (17.4)                         | 107 (24.7)                   | 116 (22.1)                        | 25 (19.4)                    |
| Pulmonary Artery Catheterization | 108 (38.6)                        | 345 (44.3)                   | 313 (58.5)                        | 277 (64.0)                   | 247 (47.0)                        | 46 (35.7)                    |
| <b>Shock Management</b>          |                                   |                              |                                   |                              |                                   |                              |
| <b>Vasopressors or inotropes</b> | 1.0 (1.0-1.0)                     | 1.0 (1.0-2.0)                | 2.0 (2.0-3.0)                     | 2.0 (2.0-3.0)                | 2.0 (1.0-3.0)                     | 3.0 (2.0-4.0)                |
| ≥2 agents                        | n/a                               | 344 (44.4)                   | 438 (82.3)                        | 357 (83.0)                   | 374 (71.5)                        | 111 (86.7)                   |
| 4h VIS                           | 2.5 (0.0-5.0)                     | 4.0 (2.0-7.5)                | 5.0 (2.5-14.0)                    | 10.0 (4.0-28.5)              | 10.0 (3.3-30.5)                   | 33.7 (10.0-80.0)             |
| 24h VIS                          | 2.5 (0.0-5.0)                     | 3.0 (0.0-6.5)                | 5.0 (2.0-12.5)                    | 10.9 (3.6-24.1)              | 7.0 (2.5-20.0)                    | 14.0 (2.0-45.0)              |
| <b>MCS</b>                       | 69 (24.6)                         | 219 (28.1)                   | 264 (49.3)                        | 251 (58.0)                   | 195 (37.1)                        | 58 (45.0)                    |
| IABP                             | 55 (79.7)                         | 141 (64.4)                   | 178 (67.4)                        | 173 (68.9)                   | 100 (51.3)                        | 19 (32.8)                    |
| Advanced MCS*                    | 16 (23.2)                         | 96 (43.8)                    | 140 (53.0)                        | 129 (51.4)                   | 117 (60.0)                        | 48 (82.8)                    |
| >1 device                        | 2 (2.9)                           | 23 (10.5)                    | 74 (28.0)                         | 78 (31.1)                    | 43 (22.1)                         | 18 (31.0)                    |
| Placed ≤24h of admission         | 57 (82.6)                         | 113 (51.6)                   | 118 (44.7)                        | 140 (55.8)                   | 120 (61.5)                        | 42 (72.4)                    |

All values represent n (%) for categorical measures and median (25-75<sup>th</sup> percentile) for continuous measures.

\*Advanced MCS includes Impella, TandemHeart, VA-ECMO, or surgical ventricular assist device.

CCCTN = Critical Care Cardiology Trials Network; h = hour; IABP = intra-aortic balloon pump; IABP SHOCK=II = intra-aortic balloon pump in cardiogenic shock II; MCS = mechanical circulatory support; n/a = not applicable as the algorithm does not allow for inclusion of these factors in the designated SCAI stage; SCAI = Society of Cardiovascular Angiography and Interventions; SOFA = sequential organ failure assessment; VIS = vasoactive=inotropic score.

**Supplemental Table 5:** Baseline Lab Values for Algorithm-Based vs. Clinician-Assigned 2019 SCAI Stage

|                                       | SCAI Stage C                      |                              | SCAI Stage D                      |                              | SCAI Stage E                      |                              |
|---------------------------------------|-----------------------------------|------------------------------|-----------------------------------|------------------------------|-----------------------------------|------------------------------|
|                                       | CCCTN 2019 SCAI Algorithm (N=280) | Clinician Assessment (N=778) | CCCTN 2019 SCAI Algorithm (N=535) | Clinician Assessment (N=433) | CCCTN 2019 SCAI Algorithm (N=525) | Clinician Assessment (N=129) |
| <b>Lactate (mmol/L)</b>               | 2.5 (1.8-3.3)                     | 2.8 (1.8-4.9)                | 2.1 (1.4-3.1)                     | 3.4 (2.1-6.5)                | 6.7 (5.0-9.4)                     | 8.0 (3.9-11.2)               |
| <2                                    | 67 (28.5)                         | 202 (29.5)                   | 197 (42.9)                        | 89 (22.4)                    | 39 (7.6)                          | 12 (9.7)                     |
| 2-<5                                  | 168 (71.5)                        | 318 (46.5)                   | 262 (57.1)                        | 174 (43.7)                   | 87 (17.0)                         | 25 (20.2)                    |
| 5-<8                                  | n/a                               | 107 (15.6)                   | n/a                               | 62 (15.6)                    | 194 (37.9)                        | 25 (20.2)                    |
| ≥8                                    | n/a                               | 57 (8.3)                     | n/a                               | 73 (18.3)                    | 192 (37.5)                        | 62 (50.0)                    |
| <b>eGFR (mL/min/1.73<sup>2</sup>)</b> | 38.9 (25.5-56.4)                  | 41.2 (26.0-60.2)             | 41.4 (26.6-62.8)                  | 38.6 (25.5-57.9)             | 39.7 (24.4-56.6)                  | 38.2 (22.9-58.1)             |
| ≥60                                   | 63 (22.5)                         | 195 (25.1)                   | 145 (27.1)                        | 100 (23.1)                   | 116 (22.1)                        | 29 (22.7)                    |
| 45-<60                                | 49 (17.5)                         | 144 (18.5)                   | 92 (17.2)                         | 75 (17.3)                    | 99 (18.9)                         | 21 (16.4)                    |
| <45                                   | 168 (60.0)                        | 439 (56.4)                   | 298 (55.7)                        | 258 (59.6)                   | 309 (59.0)                        | 78 (60.9)                    |
| <b>pH, ABG or VBG</b>                 | 7.4 (7.3-7.4)                     | 7.4 (7.3-7.4)                | 7.4 (7.3-7.4)                     | 7.3 (7.2-7.4)                | 7.2 (7.1-7.3)                     | 7.2 (7.1-7.3)                |
| ≤7.2                                  | n/a                               | 77 (12.4)                    | n/a                               | 83 (22.1)                    | 215 (42.7)                        | 55 (44.0)                    |

All values represent n (%) for categorical measures and median (25-75th percentile) for continuous measures.

CCCTN = Critical Care Cardiology Trials Network; eGFR = estimated glomerular filtration rate. n/a = not applicable as the algorithm does not allow for inclusion of these factors in the designated SCAI stage; SCAI - Society of Cardiovascular Angiography and Interventions

**Supplemental Table 6:** Reclassification of Algorithm-based 2019 SCAI Stage by the Algorithm-based 2022 SCAI Stage

| <b>In-Hospital Death?</b> | <b>Revised CCCTN Algorithm (2022 SCAI)<br/>vs.<br/>Original CCCTN Algorithm (2019 SCAI)</b> | <b>% Reclassification (n/N)</b> |
|---------------------------|---------------------------------------------------------------------------------------------|---------------------------------|
| <b>Yes<br/>(N=472)</b>    | <b>Agreement</b>                                                                            | <b>55.5% (262/472)</b>          |
|                           | <b>Correctly Up-classified</b>                                                              | <b>5.5% (26/472)</b>            |
|                           | <b>Incorrectly Down-classified</b>                                                          | <b>39.0% (184/472)</b>          |
| <b>No<br/>(N=868)</b>     | <b>Agreement</b>                                                                            | <b>51.0% (443/868)</b>          |
|                           | <b>Correctly Down-classified</b>                                                            | <b>47.4% (411/868)</b>          |
|                           | <b>Incorrectly Up-classified</b>                                                            | <b>1.6% (14/868)</b>            |

CCCTN = Critical Care Cardiology Trials Network; SCAI = Society of Cardiovascular Angiography and Interventions.

**Supplemental Table 7:** Reclassification of Algorithm-based 2022 SCAI Stage by Clinician-assigned 2019 SCAI stage

| <b>In-Hospital Death?</b> | <b>Clinician Assessment (2019 SCAI)<br/>vs.<br/>Revised CCCTN Algorithm (2022 SCAI)</b> | <b>% Reclassification (n/N)</b> |
|---------------------------|-----------------------------------------------------------------------------------------|---------------------------------|
| <b>Yes<br/>(N=472)</b>    | <b>Agreement</b>                                                                        | <b>50.6% (239/472)</b>          |
|                           | <b>Correctly Up-classified</b>                                                          | <b>20.6% (97/472)</b>           |
|                           | <b>Incorrectly Down-classified</b>                                                      | <b>28.8% (136/472)</b>          |
| <b>No<br/>(N=868)</b>     | <b>Agreement</b>                                                                        | <b>66.9% (581/868)</b>          |
|                           | <b>Correctly Down-classified</b>                                                        | <b>19.0% (165/868)</b>          |
|                           | <b>Incorrectly Up-classified</b>                                                        | <b>14.1% (122/868)</b>          |

CCCTN = Critical Care Cardiology Trials Network; SCAI = Society of Cardiovascular Angiography and Interventions.

**Supplemental Figure 1: In-Hospital Mortality across Etiologies of Cardiogenic Shock by Clinician-Assigned SCAI Stage**

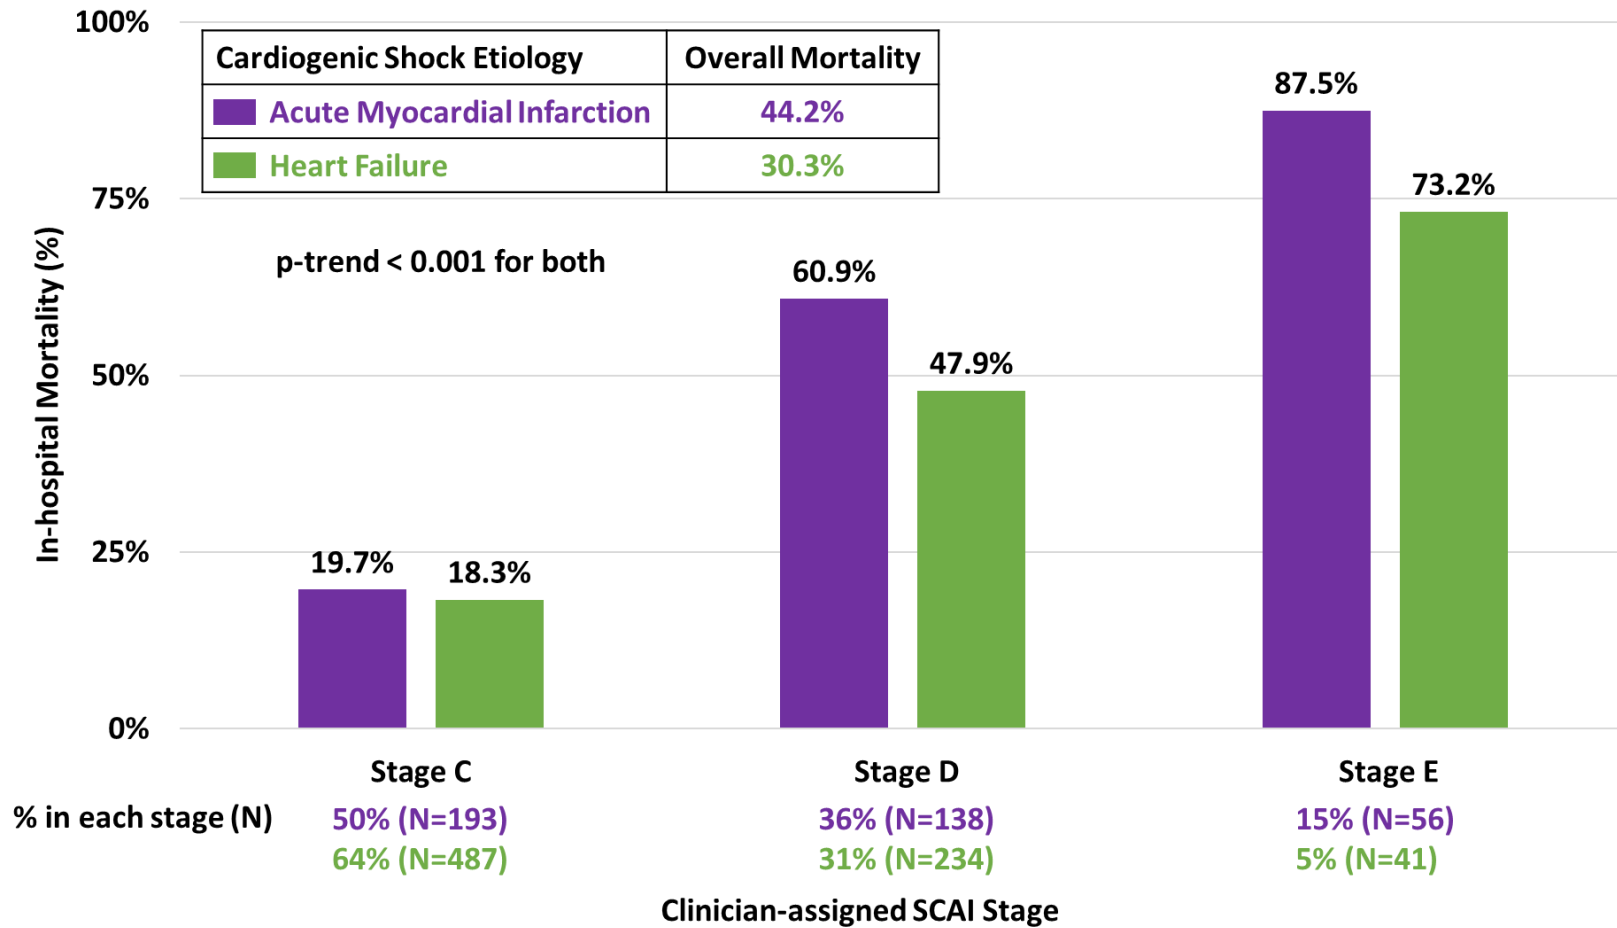

AMI-CS had higher overall mortality compared with HF-CS. Clinician application of SCAI staging identified a stepwise gradient of mortality risk within both subgroups (p-trend < 0.001 for each). AMI-CS = acute myocardial infarction cardiogenic shock. HF-CS = heart failure cardiogenic shock. SCAI = Society of Cardiovascular Angiography and Interventions.

**Supplemental Figure 2: In-Hospital Mortality across Shock Types by Clinician-Assigned SCAI Stage**

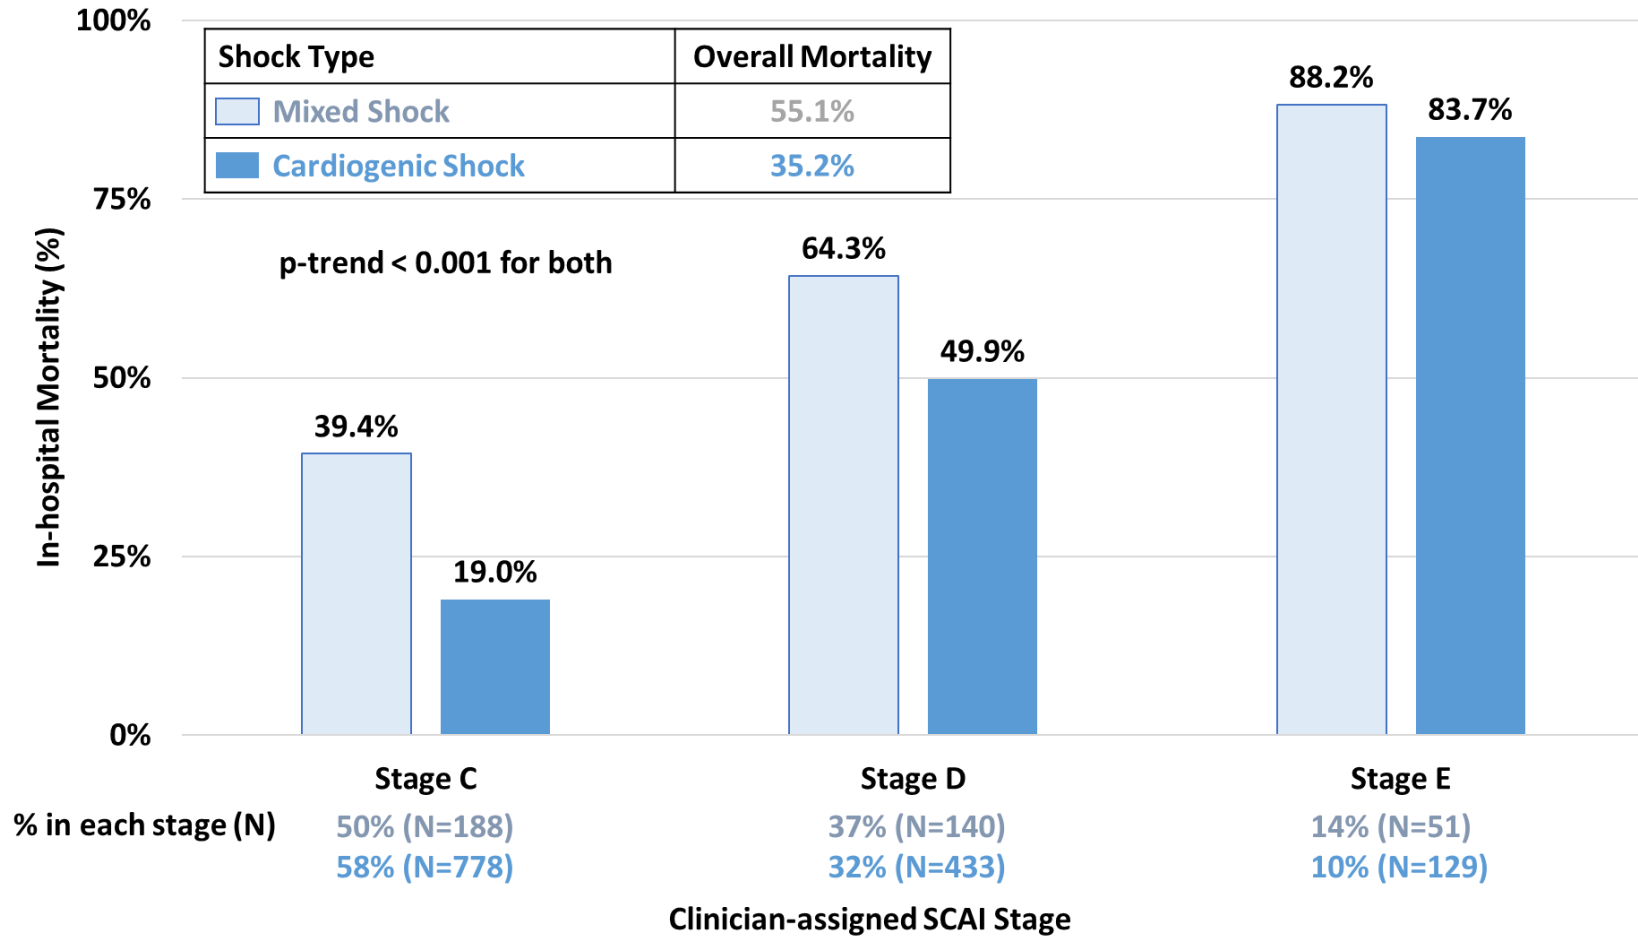

Mixed shock had higher overall mortality compared with cardiogenic shock. Clinician application of SCAI staging identified a stepwise gradient of mortality risk in both shock types (p-trend <0.001 for each). SCAI = Society of Cardiovascular Angiography and Interventions.

**Supplemental Figure 3: In-Hospital Mortality across Preceding Cardiac Arrest Status by Clinician-Assigned SCAI Stage**

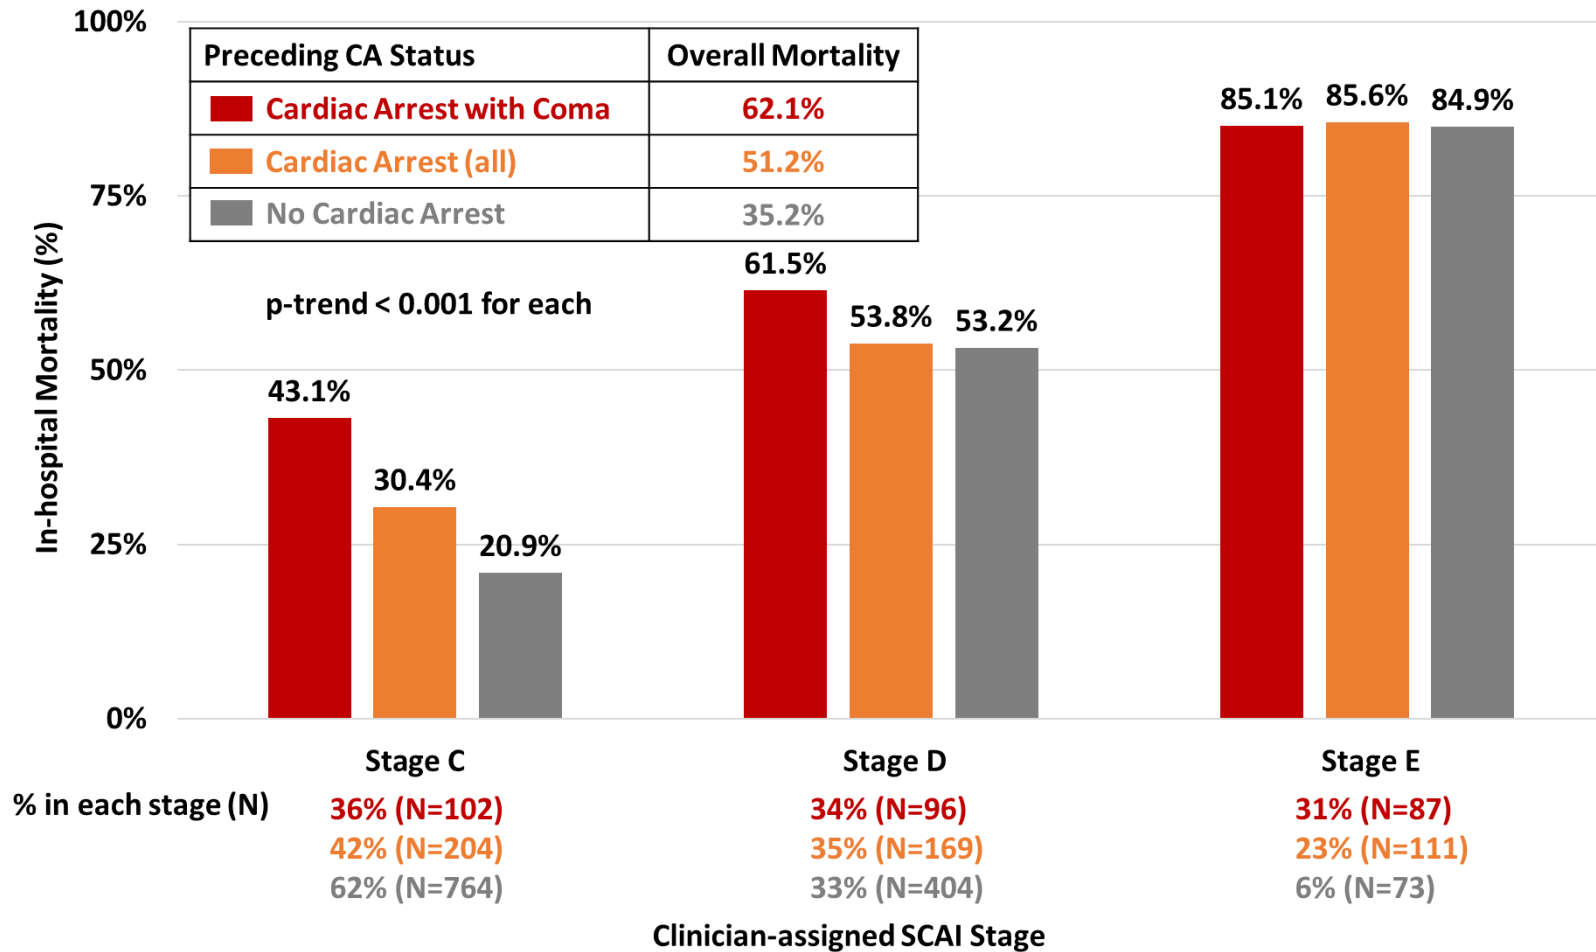

Patients with preceding cardiac arrest, with or without coma, had higher overall mortality than those without preceding cardiac arrest. Clinician application of SCAI staging identified a stepwise gradient of mortality risk irrespective of preceding cardiac arrest status (p-trend <0.001 for each). SCAI = Society of Cardiovascular Angiography and Interventions.

**Supplemental Figure 4:** In-Hospital Mortality for Outside Hospital Transfers and All Cardiogenic Shock Patients by Clinician-Assigned SCAI Stage

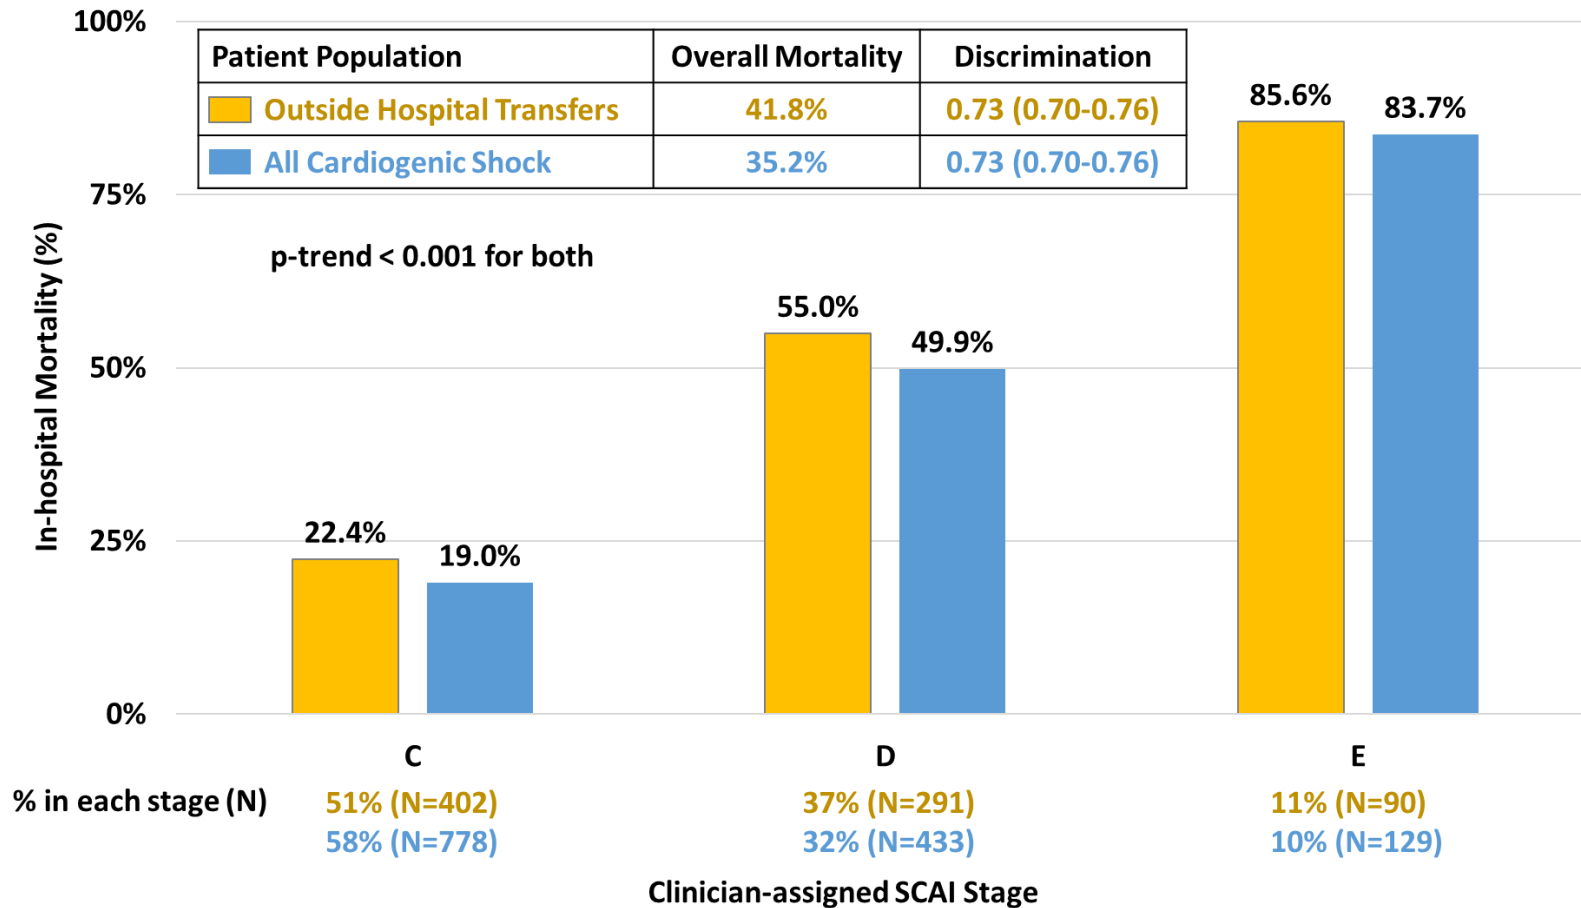

In-hospital mortality within each clinician-assigned SCAI stage and overall discrimination did not differ for patients transferred from outside hospitals compared with all cardiogenic shock patients. SCAI = Society of Cardiovascular Angiography and Interventions.



**Supplemental Figure 5:** Probability of In-Hospital Mortality by Absolute Change and Starting Value of the Vasoactive-Inotropic Score

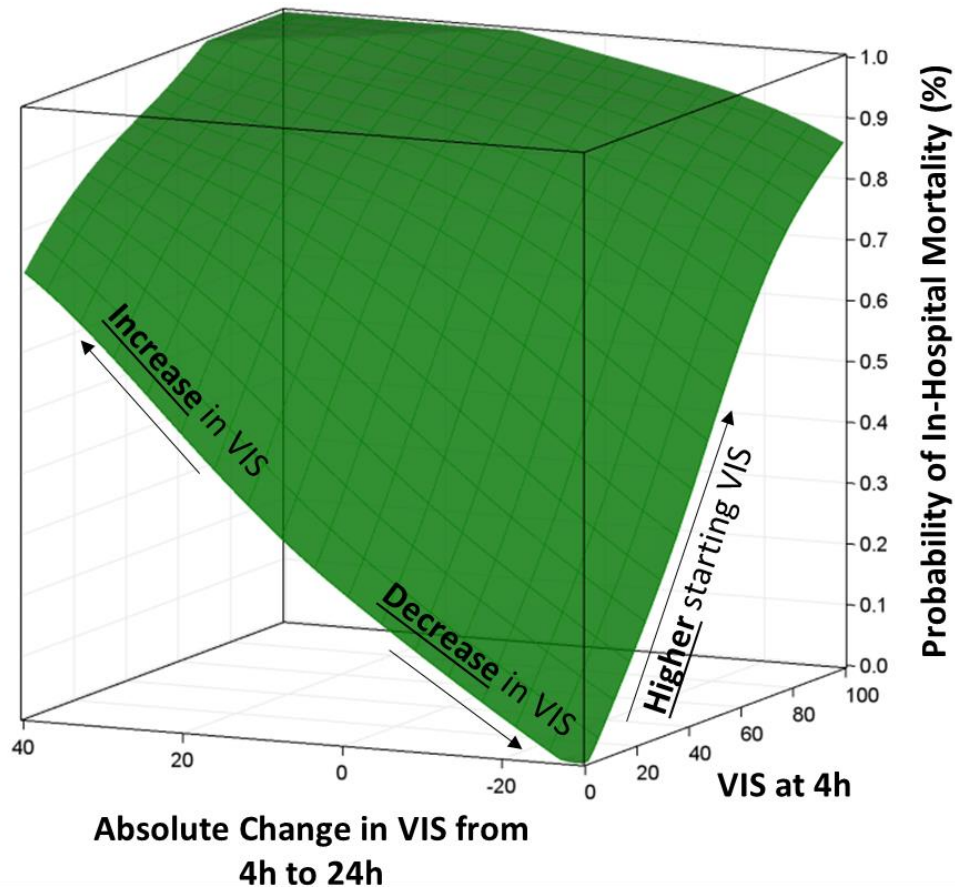

Continuous modeling of absolute changes in VIS at 24 hours as a function of the initial starting VIS at 4 hours was performed using restricted cubic splines. This surface plot illustrates that in-hospital mortality increases with higher starting VIS and with greater increases in VIS. VIS = vasoactive-inotropic score, a weighted sum reflective of combined dosing of all vasopressors and inotropes.

**Supplemental Figure 6:** In-Hospital Mortality by Number of Vasoactive Agents and Mechanical Circulatory Support Devices

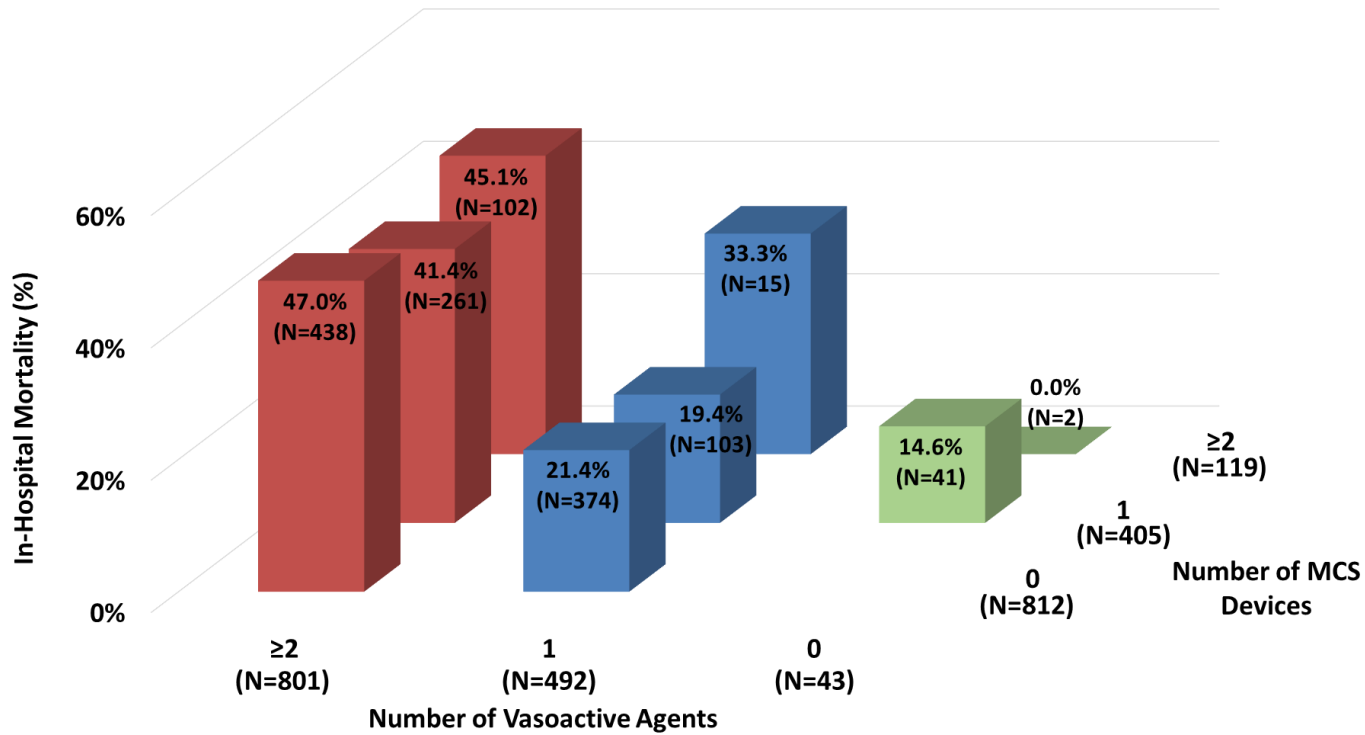

This figure displays the relationship between in-hospital mortality based on the number of vasoactive agents and MCS devices. This relationship was more variable when compared to the relationship between in-hospital mortality and VIS. MCS = mechanical circulatory support. VIS = vasoactive-inotropic score

**Supplemental Figure 7: In-Hospital Mortality by Vasoactive-Inotropic Score and Number of Vasoactive Agents**

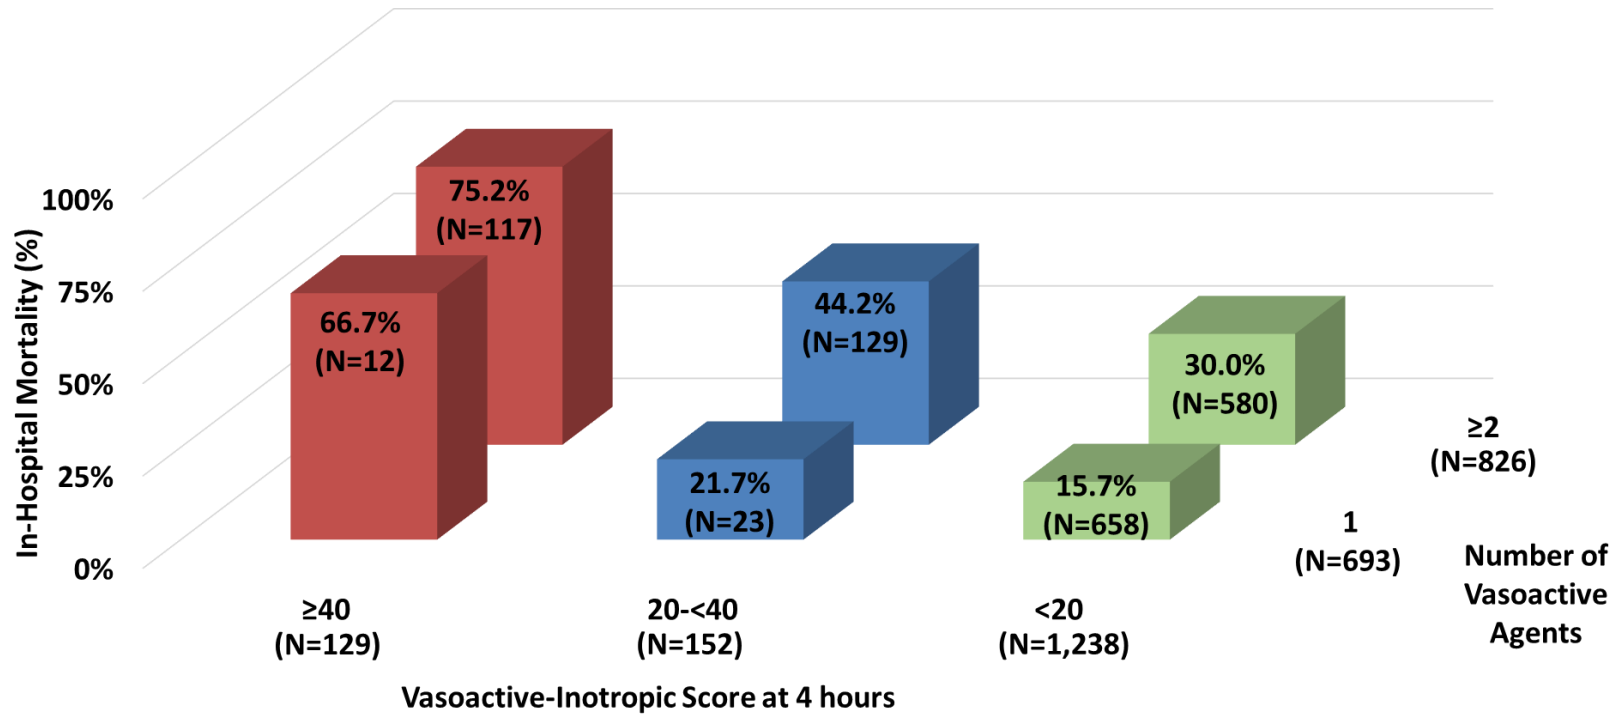

The initial starting value of VIS at 4 hours identified a gradient of risk regardless of whether single or multiple vasoactive agents were used. VIS = vasoactive-inotropic score.
